# Supplementary material for: Long-Term Maintenance of Certolizumab Pegol Safety and Efficacy, in Combination with Methotrexate and as Monotherapy, in Rheumatoid Arthritis Patients
Source: PubMed Central journal article supplement — Rheumatol Ther. 2017 Mar 28;4(1):57–69. doi: 10.1007/s40744-017-0060-8 (PMC5443729; doi:10.1007/s40744-017-0060-8), 2017-03-28
Supplement: 40744_2017_60_MOESM1_ESM.pdf [file 40744_2017_60_MOESM1_ESM.pdf]

**Figure S1. Patient retention analysis (Kaplan Meier analysis; CZP ITT and CZP monotherapy sub-populations). Analyses were performed for: (a) Time to withdrawal for any reason; (b) Time to withdrawal due to lack of efficacy (LOE), adverse event (AE), not consenting to enter the OLE or addition of MTX for monotherapy patients; and time to withdrawal due to (c) LOE or addition of MTX for monotherapy patients or (d) AE alone**

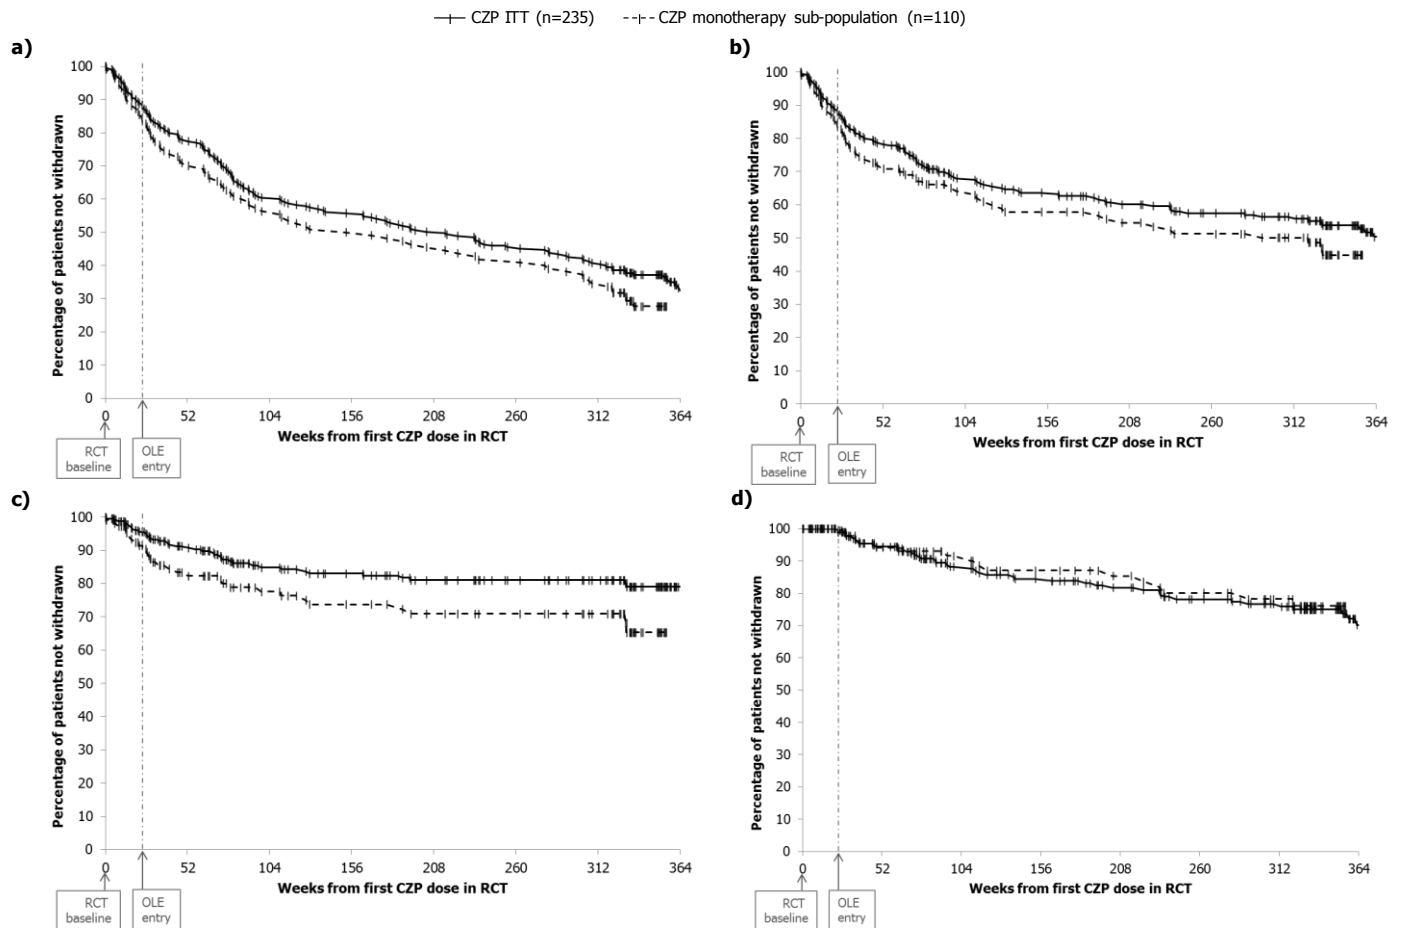

**Figure S2: Mean DAS28-3(CRP) in CZP ITT patients (N=235), and the CZP monotherapy (n=110) and CZP+MTX (n=125) sub-populations (absolute values, LOCF)**

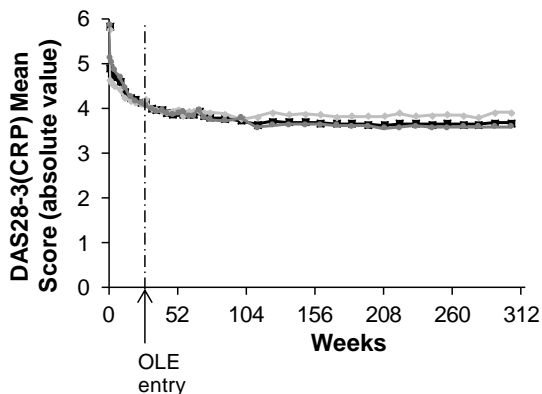

**Table S1: Summary of adverse events (AEs) in all patients treated with CZP in the RCTs or OLE over time (safety population)**

| Time of occurrence (months)           | 0-<3                         | ≥3-<6        | ≥6-<12       | ≥12-<18      | ≥18-<24      | ≥24-<36      | ≥36-<48      | ≥48-<60      | ≥60          |
|---------------------------------------|------------------------------|--------------|--------------|--------------|--------------|--------------|--------------|--------------|--------------|
| <b>Event</b>                          | <b>Event Rate per 100 PY</b> |              |              |              |              |              |              |              |              |
| Primary System Organ Class            |                              |              |              |              |              |              |              |              |              |
| High Level Term                       |                              |              |              |              |              |              |              |              |              |
| Preferred Term                        | N=427                        | N=415        | N=393        | N=358        | N=314        | N=285        | N=262        | N=238        | N=218        |
| <b>Any AE<sup>a</sup></b>             | <b>690.4</b>                 | <b>462.6</b> | <b>423.6</b> | <b>411.6</b> | <b>395.5</b> | <b>375.2</b> | <b>357.8</b> | <b>418.7</b> | <b>360.7</b> |
| Infections and infestations           | 141.2                        | 92.1         | 99.2         | 114.4        | 114.4        | 110.4        | 98.5         | 138.5        | 108.7        |
| Tuberculosis                          | 0                            | 0            | 0            | 0            | 0.7          | 0            | 0.8          | 0            | 0            |
| Candida infection (including topical) | 2.9                          | 0            | 0.6          | 0            | 0.7          | 0.4          | 2.4          | 2.2          | 0.6          |
| Herpes viral infections               | 7.7                          | 4.0          | 9.8          | 5.5          | 4.8          | 4.9          | 4.9          | 7.2          | 3.9          |
| Herpes simplex                        | 5.8                          | 2.0          | 7.1          | 3.6          | 2.7          | 3.4          | 4.5          | 5.4          | 2.5          |
| Herpes zoster                         | 1.9                          | 2.0          | 2.7          | 1.8          | 2.0          | 1.5          | 0.4          | 1.8          | 1.4          |
| Injection and infusion site reactions | 26.1                         | 9.0          | 3.8          | 1.2          | 1.4          | 1.5          | 2.0          | 0.5          | 2.2          |
| Injection site reaction               | 8.7                          | 2.0          | 0.6          | 0.6          | 0            | 0.8          | 1.2          | 0            | 0.3          |
| Injection site pain                   | 1.9                          | 3.0          | 0            | 0            | 0.7          | 0            | 0            | 0            | 0.8          |
| Cardiac disorders                     | 6.8                          | 1.0          | 7.1          | 7.3          | 8.2          | 8.2          | 1.2          | 4.0          | 6.6          |
| Neoplasms <sup>b</sup>                | 1.9                          | 2.0          | 4.4          | 4.8          | 4.1          | 2.6          | 2.8          | 3.6          | 5.8          |

<sup>a</sup>43.6% of AEs for the safety population were classed as severe in intensity; <sup>b</sup>Neoplasms could be benign, malignant or unspecified (includes cysts and polyps).

Safety population included all patients who received CZP in either the RCT or OLE. MedDRA version 9.0.
